# Supplementary material for: Wechselwirkungen in der dermatologischen Systemtherapie
Source: Springer Nature journal article supplement (doi:10.1007/s00105-020-04726-9), 2020-11-26
Supplement: MOESM1 [file 18629268]

## **Online-Abbildungen 1-12: Wechselwirkungen in der dermatologischen Systemtherapie**

**Online-Abb. 1** Übersicht Medikamenteninteraktionen

**Online-Abb. 2** Faktoren, die das Risiko von Medikamenteninteraktionen beeinflussen

**Online-Abb. 3 Lebermetabolismus:** CYP-induzierte Interaktion von Azol-Antimykotika und Phenprocoumon

**Online-Abb. 4 Lebermetabolismus:** Interaktion von Azathioprin und Allopurinol

**Online-Abb. 5 Absorption:** Interaktion von Antibiotika und Phenprocoumon

**Online-Abb. 6 Renale Elimination:** Interaktion von Aciclovir mit nephrotoxischen Medikamenten

**Online-Abb. 7 QT-Zeit-Verlängerung:** Synergistischer Effekt von Chloroquin und QT-Zeit verlängernden Medikamenten

**Online-Abb. 8 und 9 Orale Retinoide:** Interaktion von orale Retinoiden und Lipidsenkern

**Online-Abb. 10 Immunsuppressiva:** Interaktion von Methotrexat (MTX) und nicht-steroidalen Antirheumatika (NSAR)

**Online-Abb. 11 Immunsuppressiva:** Interaktion von Mycophenolatmofetil und Protonenpumpeninhibitoren

**Online-Abb. 12** Polypharmazie im Alter

## Pharmakokinetik

## Pharmakodynamik

Absorption

Additive/Synergistische Wirkung

Verteilung

Metabolisierung

Antagonistische Wirkung

Elimination

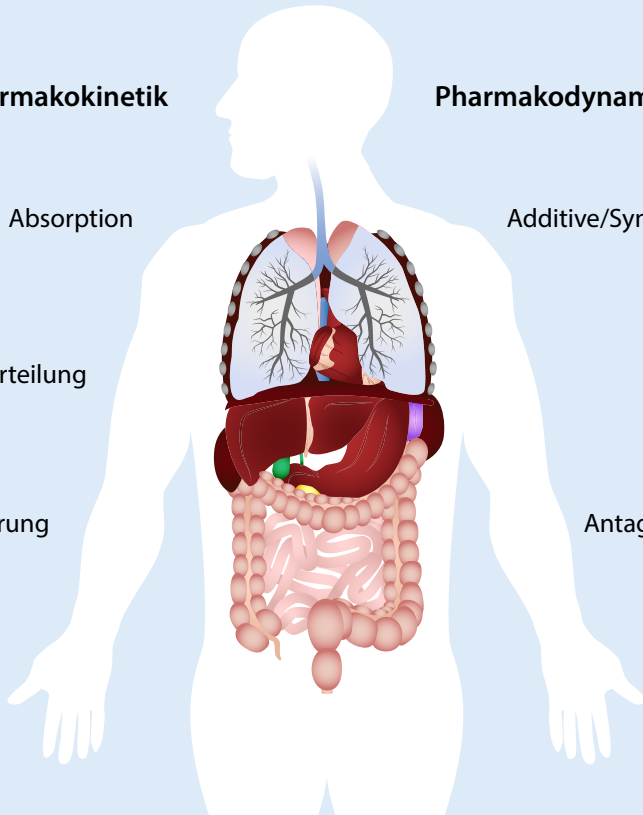

## Polypharmazie

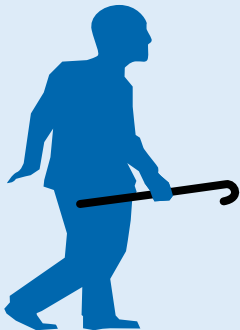

Genetische Faktoren:

- Thiopurin-Methyltransferase
- Langsame Acetylierer
- Polymorphismen

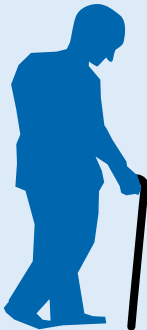

Dysfunktion:

- Leber
- Nieren
- Herz

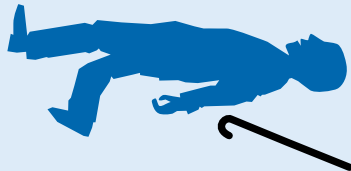

Metabolische Faktoren:

- Übergewicht
- Hypothyreose
- Hypoproteinämie

**Azolanantimykotika:** + **Marcumar®**  
Itraconazol  
Fluconazol  
Ketoconazol

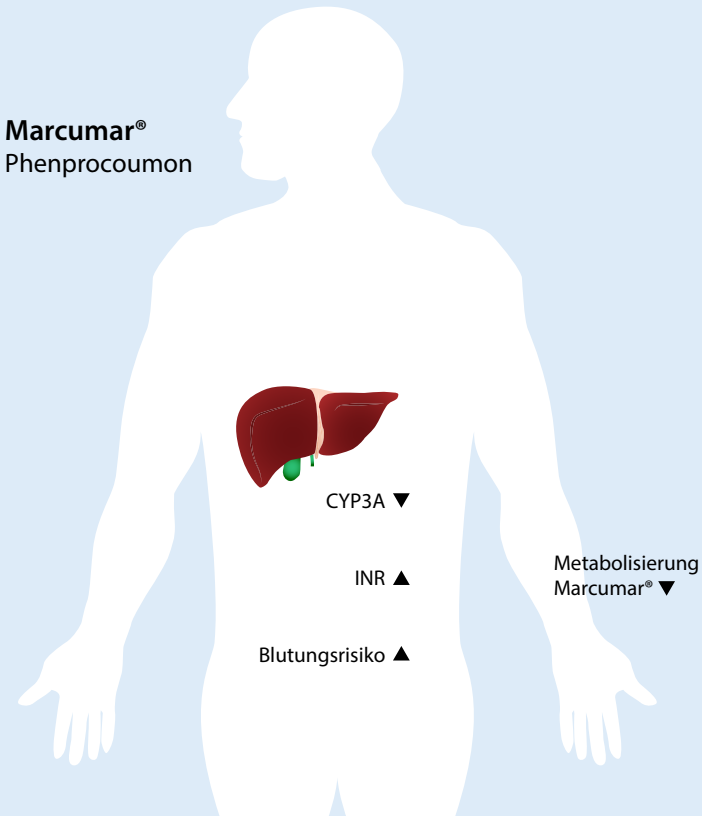

# Azathioprin + Allopurinol

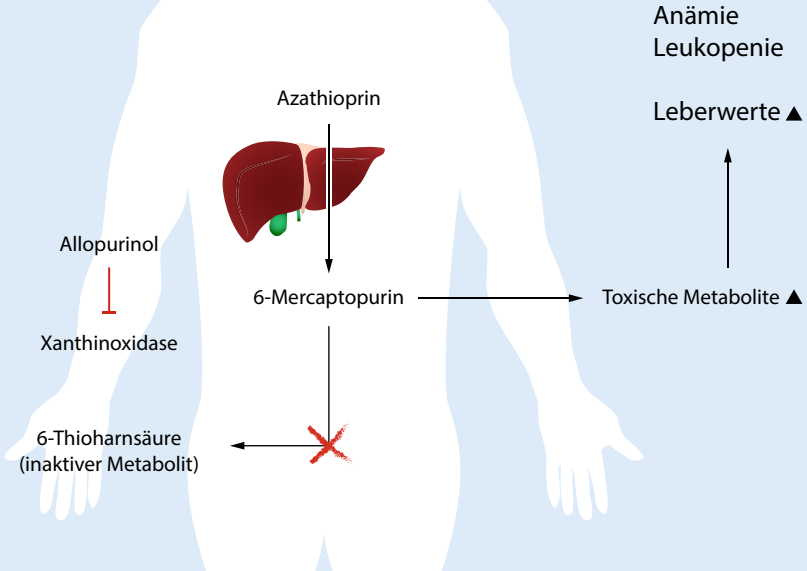

**Antibiotika:** + **Marcumar®**  
 Tetracycline  
 Makrolide  
 Clindamycin  
 Gyrasehemmer

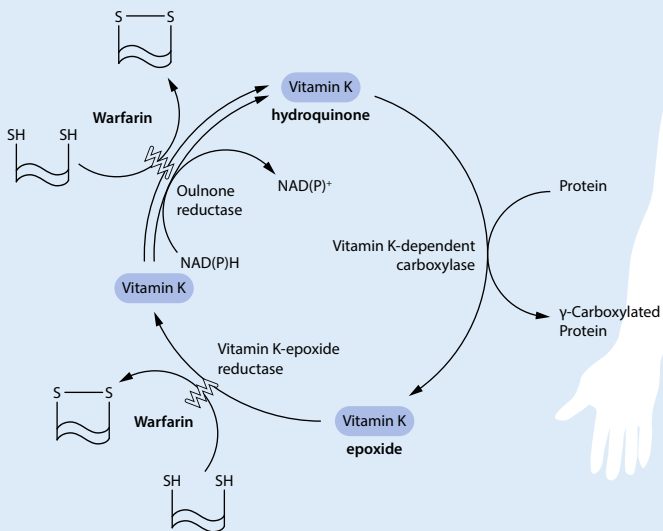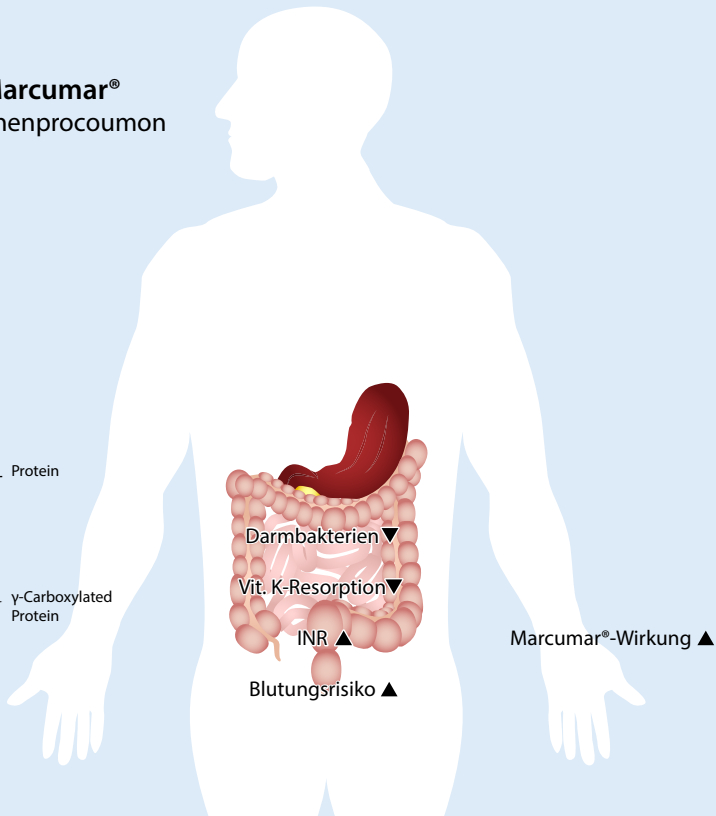

## Aciclovir

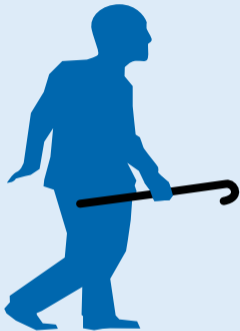

Zoster  
Creatinin ▲  
GFR ▼

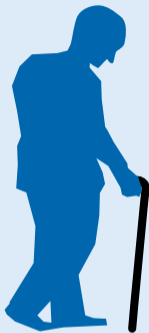

Nephrotoxische Medikamente:

- Ciclosporin
- Aminoglykoside
- NSAR
- Penicilline
- Cephalosporine

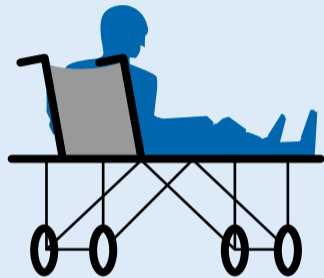

Niereninsuffizienz

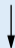

Dialyse

Chloroquin  
Hydroxychloroquin

+ **QT-Zeit ▲**

- Amiodaron
- Sotalol
- Fluorchinolone
- Makrolide
- Dabrafenib
- Vemurafenib

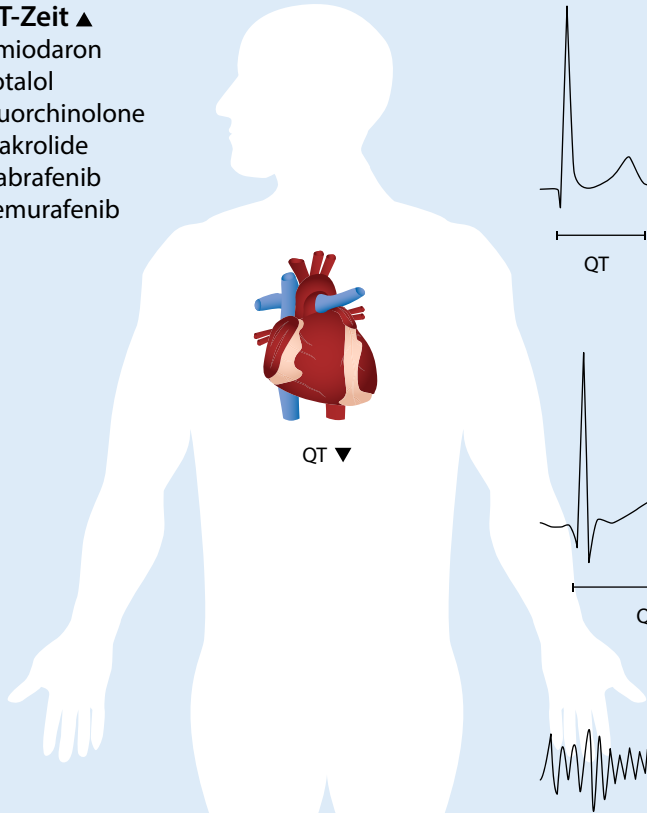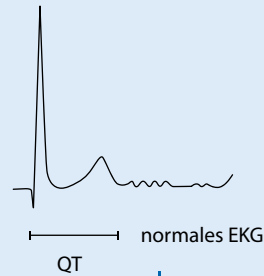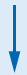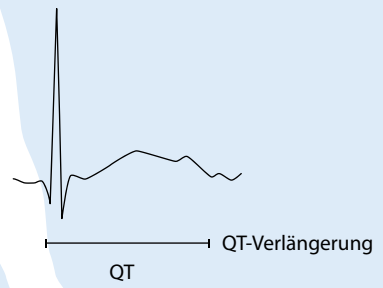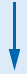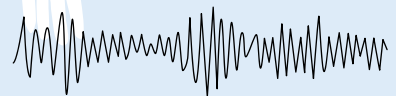



Retinoide:

- Isotretinoin
- Acitretin
- Alitretinoin
- Bexaroten

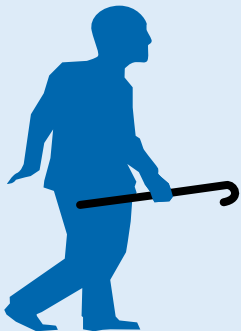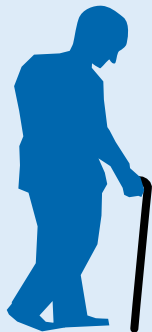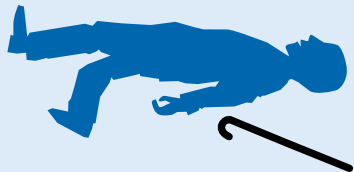

Fibrate:

- Fenofibrat
- Bezafibrat
- Gemfibrozil

+ Statine:

- Simvastatin
- Atorvastatin

Myopathie

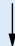

Rhabdomyolyse

**Retinoidtherapie: + Statine**

Isotretinoin

Acitretin

Alitretinoin

Bexaroten

**Fibrate**

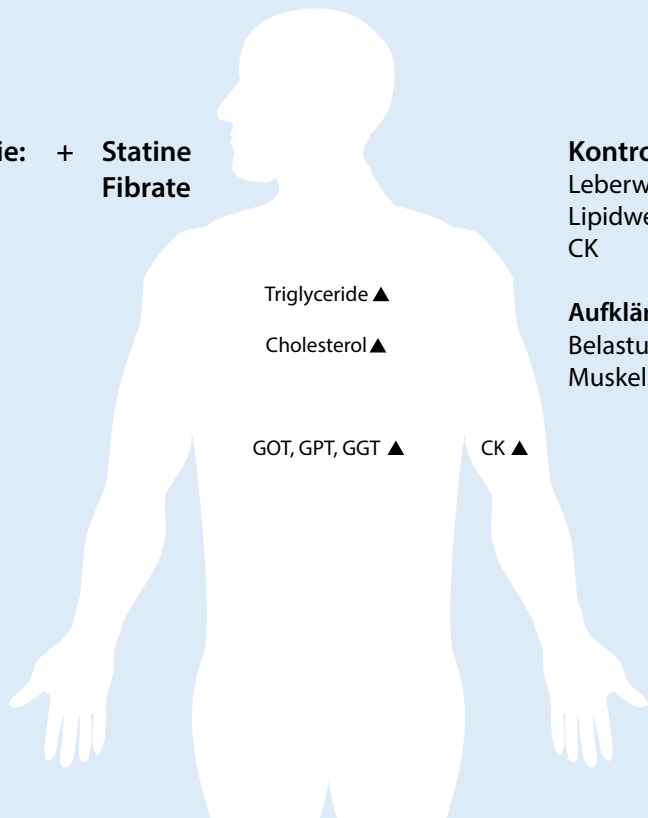

Triglyceride ▲

Cholesterol ▲

GOT, GPT, GGT ▲

CK ▲

**Kontrolle:**

Leberwerte

Lipidwerte

CK

**Aufklärung:**

Belastung vermeiden

Muskelschmerzen

ASS 100  
MTX

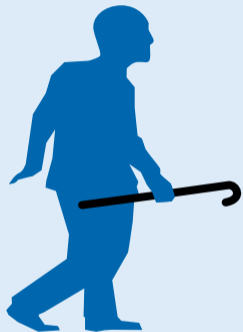

Psoriasis vulgaris et arthropathica  
Z. n. Myokardinfarkt  
KHK

+ Ibuprofen

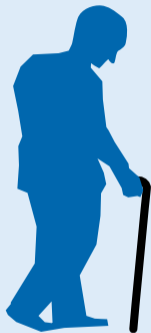

Schmerzen

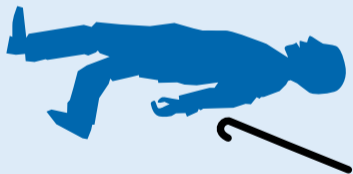

Thrombembolische  
Komplikationen

**CellCept®**  
Mycophenolat  
mofetil

+

**PPI:**  
Omeprazol  
Pantoprazol

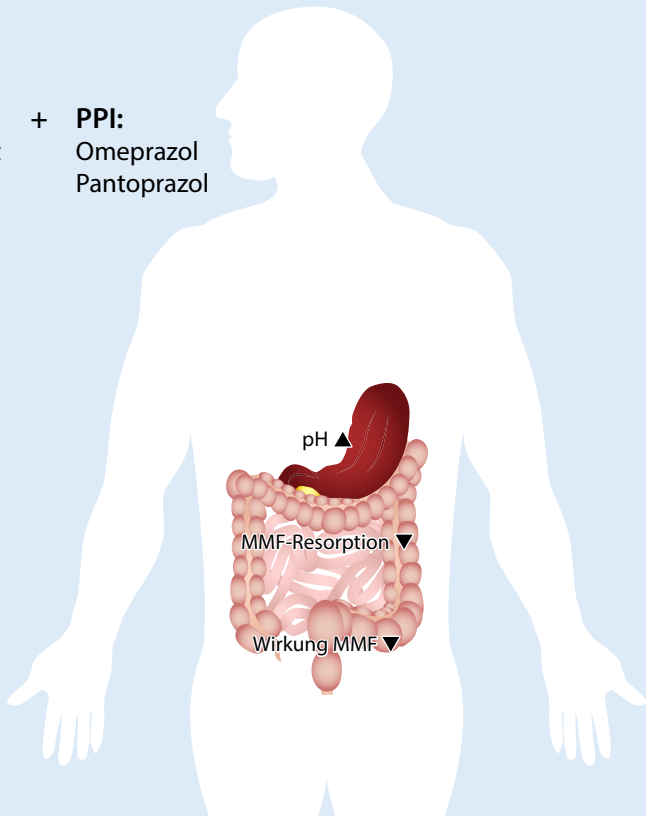

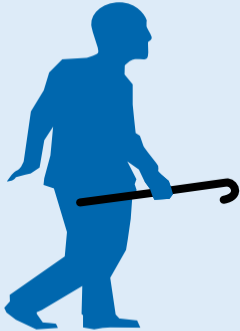

Medikament 1

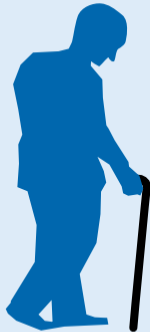

+ Medikament 2

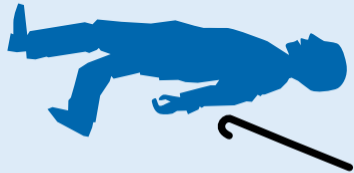

+ Medikament 3

Medikamenteninteraktionen sind häufig, müssen beachtet werden und sind vermeidbar!
